# Supplementary material for: Three AP2/ERF family members modulate flavonoid synthesis by regulating type IV chalcone isomerase in citrus
Source: PubMed Central journal article supplement (PMC8051604; doi:10.1111/pbi.13494), 2020-11-27
Supplement: PBI-19-671-s001.pdf [file PBI-19-671-s001.pdf]

**Figure S1. Main flavonoids in citrus and their biosynthetic pathways.**

(a) The proposed early biosynthetic pathways of flavanones and flavones in citrus. (b) Representative high-performance liquid chromatography (HPLC) profiles of flavonoid detected in the peel of stage 1 (S1) fruit at 280nm. (Eriocitrin and Neeriocitrin mainly accumulate in leaves).

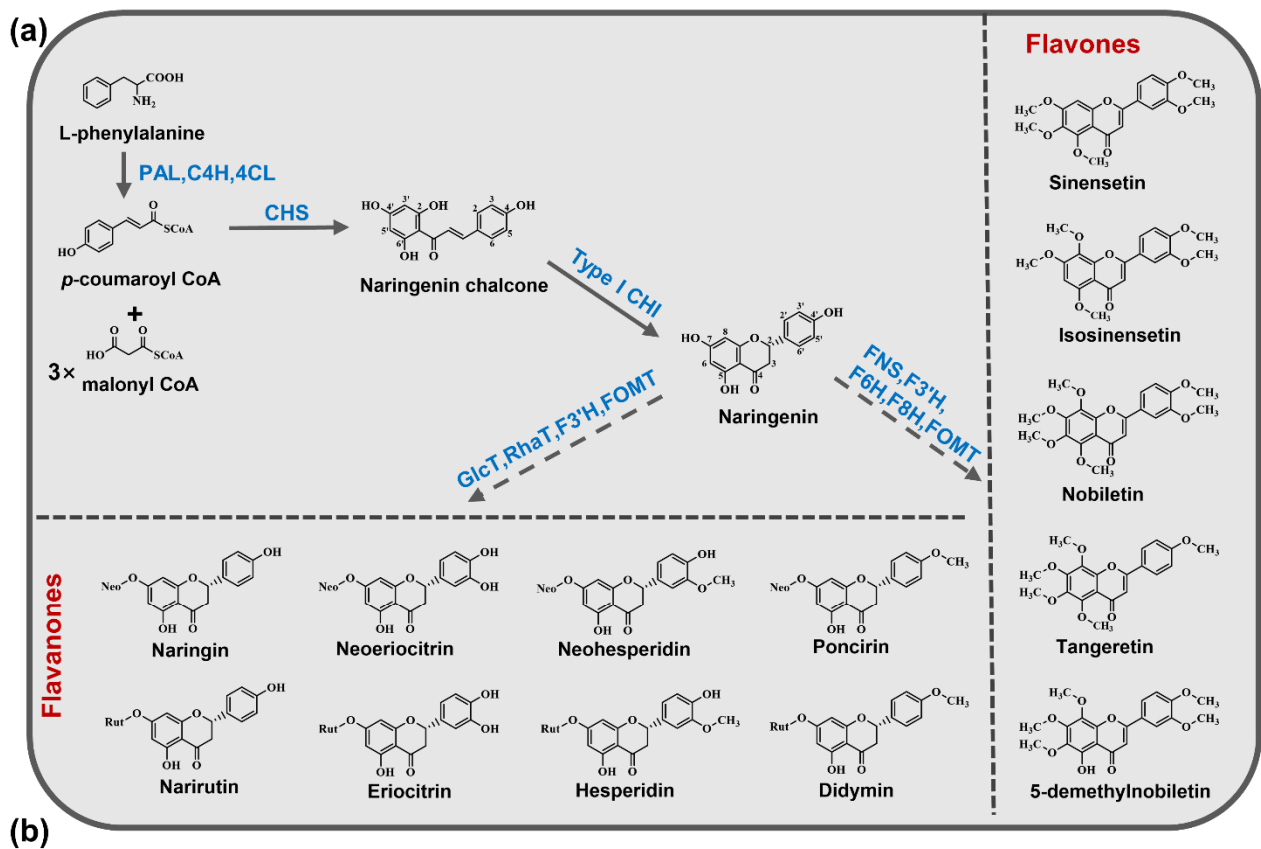

**Figure S2. The correlation between expression of *CHI-fold* genes and flavonoid content during fruit development.** The linear fitting analysis were conducted by Origin Pro with significant differences obtained by *F*-test (ANOVA).

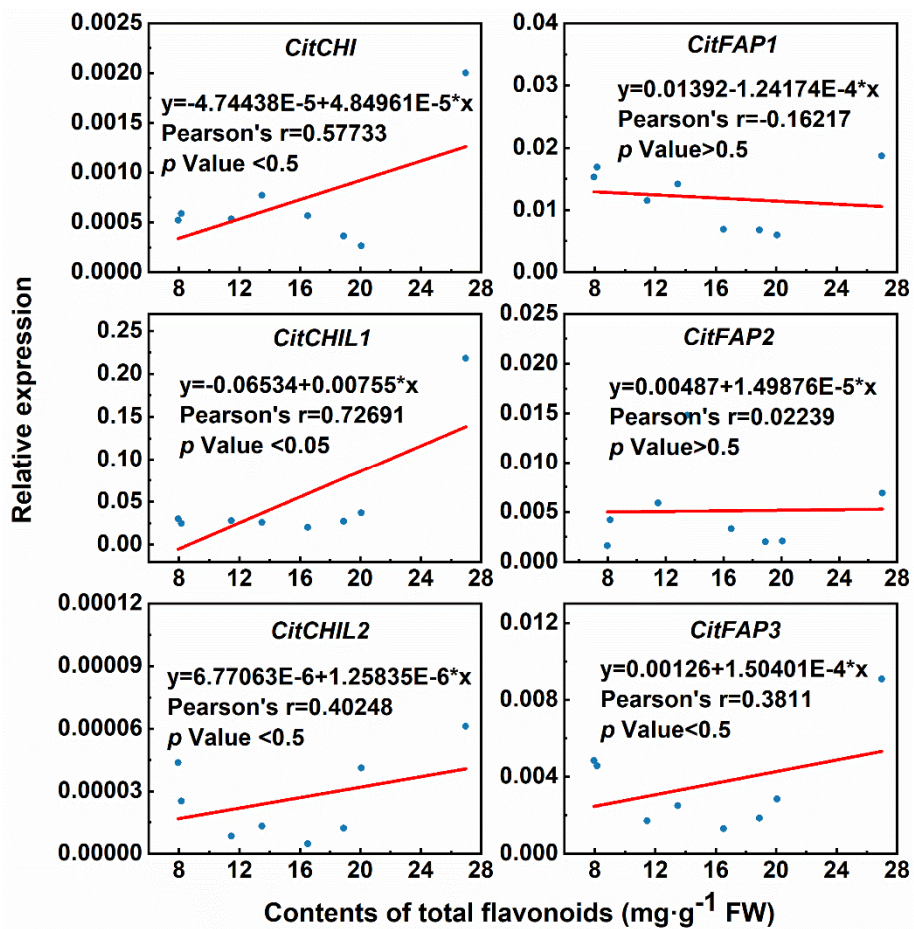

**Figure S3. Sequence alignment of CitCHIL1 with type IV CHI from other species and a *bona fide* chalcone isomerase AtCHI.**

The structure of AtCHI (PDB: 4DOI) in RCSB PDB (<http://www.rcsb.org/>) was used as protein template (Ngaki et al., 2012). Secondary structure is displayed above the sequences block. Helices and  $\beta$ -strands are depicted as coils and arrows. Residues of the (2*S*)-naringenin binding cleft are shown with yellow stars, and those for the hydrogen bond network in the active site are shown with red stars (Cheng et al., 2018). The yellow box identifies residues proposed to determine substrate preference for isoliquiritigenin and naringenin chalcone. The conserved sequence alignment of type IV chalcone isomerase branch was analyzed using Expresso method in T-Coffee (<http://tcoffee.org.cat/>) and the protein structures were marked by ESPript 3.0 (<http://esprict.ibcp.fr/>).

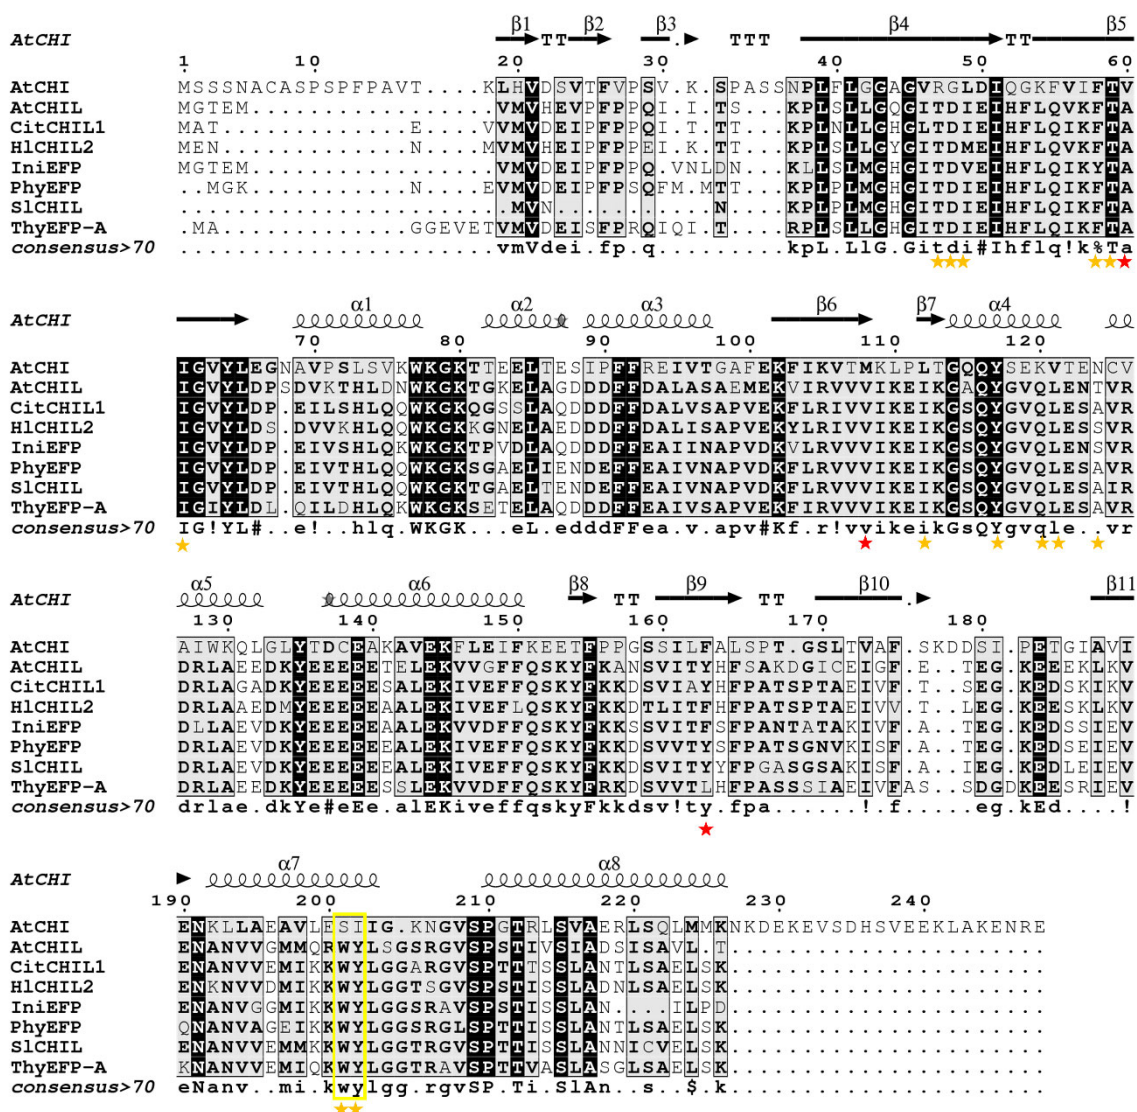

### Figure S4. Analysis of recombinant proteins and chalcone isomerase reactions.

(a) SDS-PAGE analysis of the recombinant enzymes expressed in *E. coli* strain BL21. C. E., crude extract; P. P., purified protein; M, protein marker. (b, c) HPLC analyses of the products from chalcone isomerase reaction. (b) Reactions incubated with naringenin chalcone as substrate and using 2 $\mu$ g protein. NC, naringenin chalcone; NA, naringenin; EV, proteins of empty pET32a vector. (c) Reactions incubated with isoliquiritigenin as substrate and using 50 $\mu$ g protein. ILQ, isoliquiritigenin; LQ, liquiritigenin; EV, proteins of empty pET32a vector.

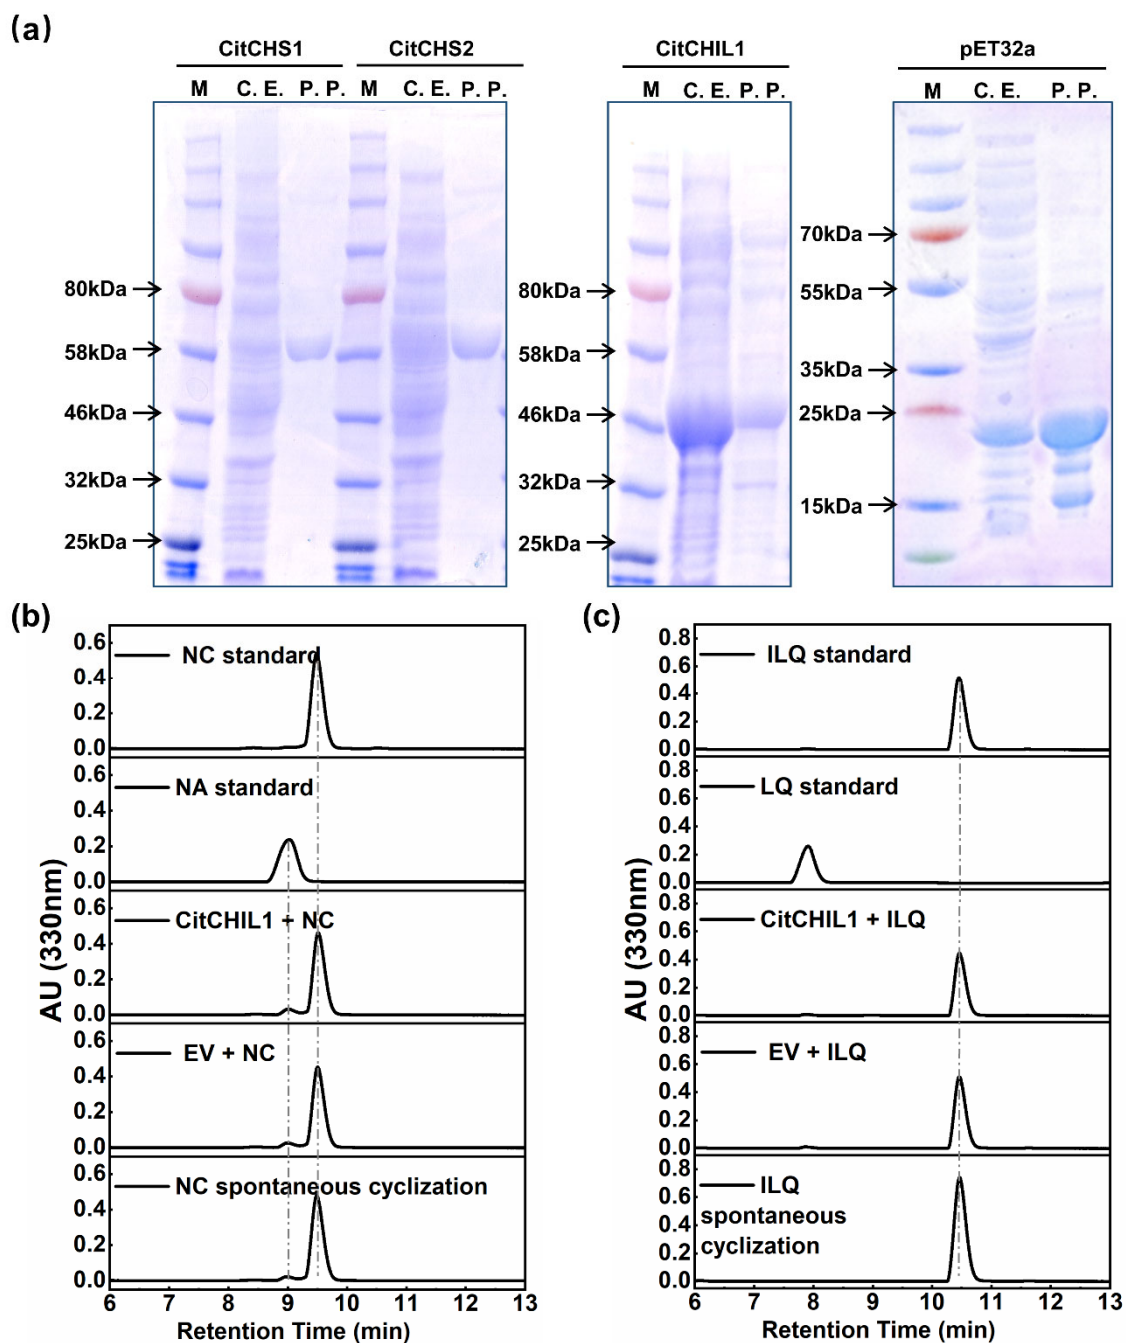

**Figure S5. Kinetic study of CitCHSs and CitCHS/CitCHIL1 complexes.**

Michaelis-Menten plots of CitCHS1 and CitCHS1/CitCHIL1 complex and CitCHS2 and CitCHS2/CitCHIL1 complex with inset Lineweaver-Burk plots. The kinetic parameters  $K_m$  and  $V_{max}$  were calculated by nonlinear regression analysis using GraphPad Prism 8 software. These results were averages of three experiments. Error bars denote SE of the means.

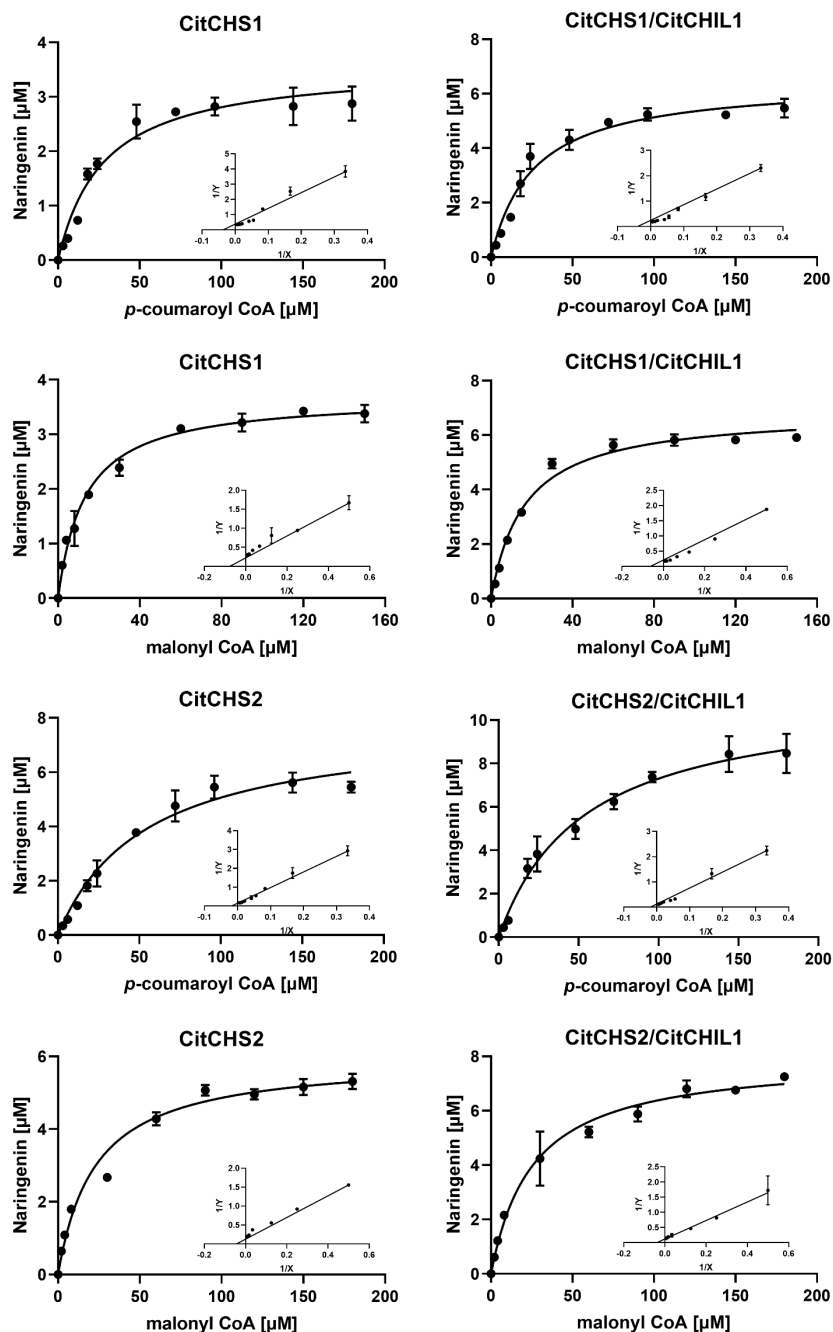

**Figure S6. Physical interaction between CitCHIL1 and AtCHS and main flavonoids in Arabidopsis.**

(a) Firefly luciferase complementation imaging (LCI) analyses of the direct interaction between CitCHIL1 and AtCHS in *Nicotiana benthamiana* leaves. The luciferase images visualized the interaction *in vivo*. (b) Representative HPLC profiles of flavonoid detected in the silique of 5-week-old WT and transgenic Arabidopsis at 350nm.

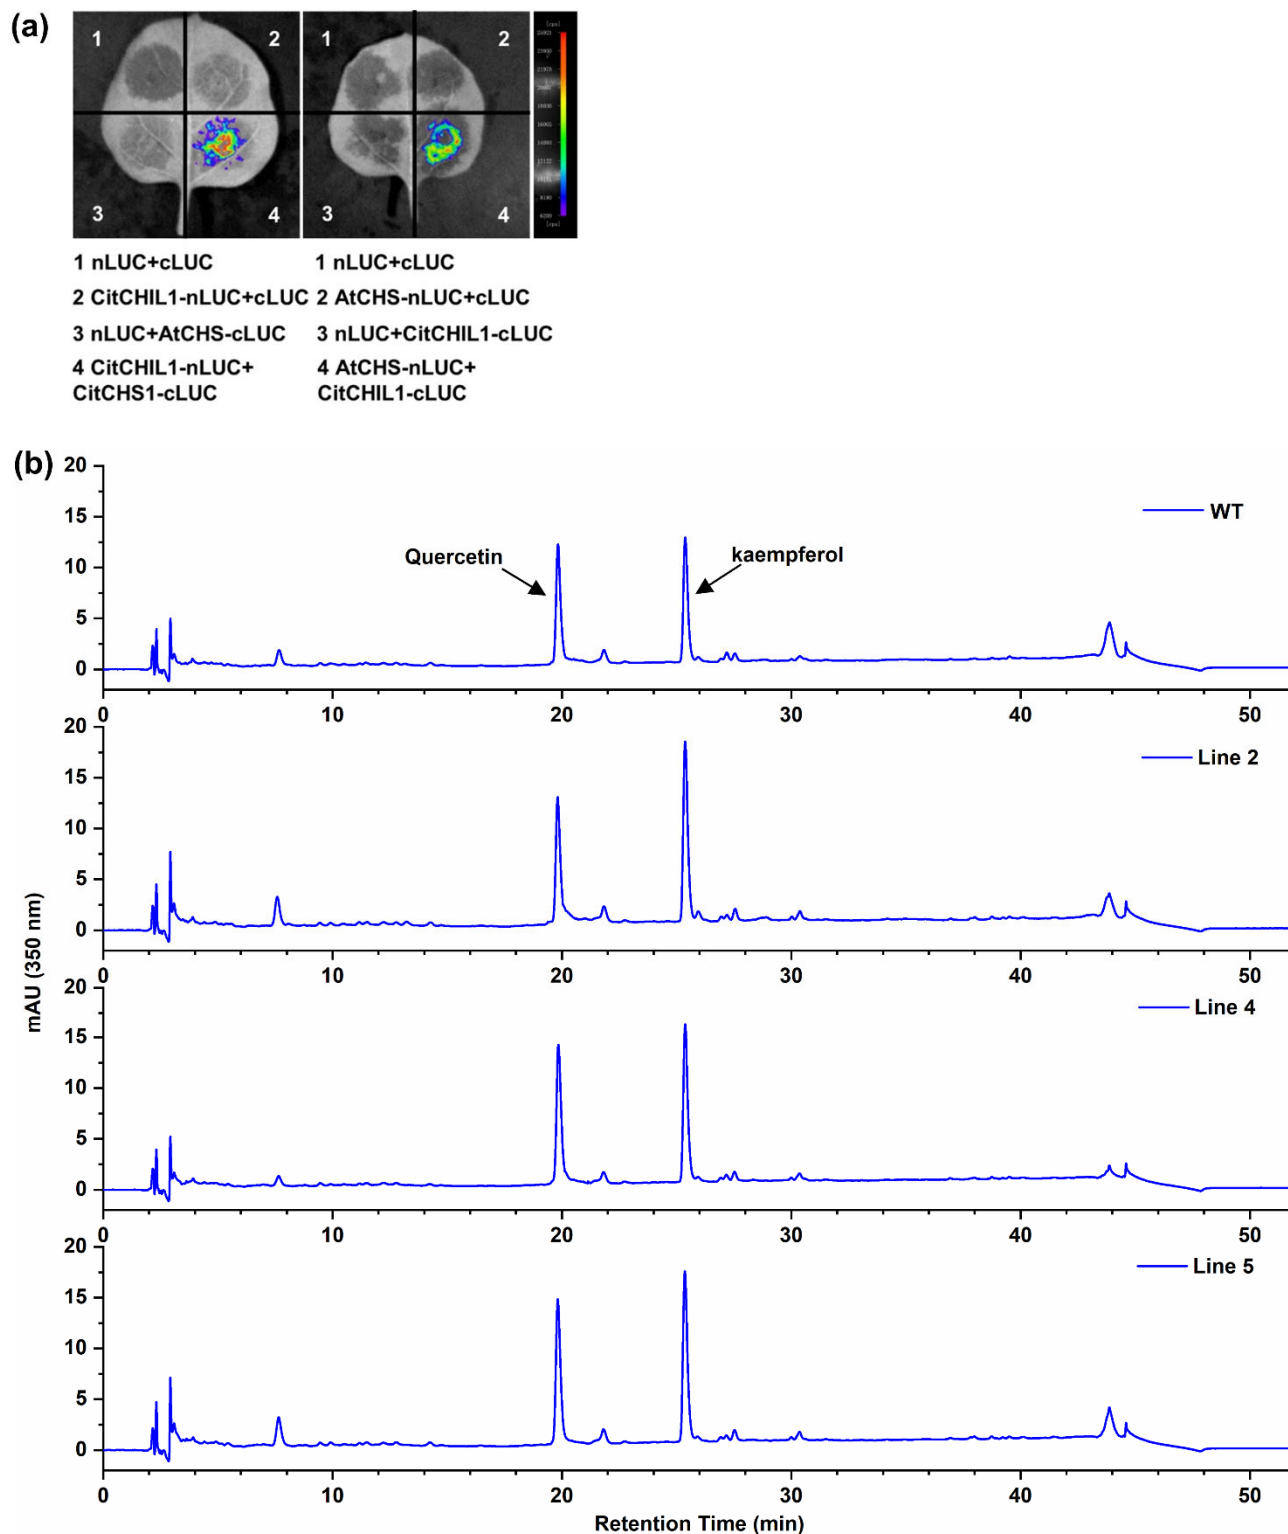



**Figure S7. Regulatory effects of TFs screened by Y1H library screening with the promoter of *CitCHIL1*.** Firefly luciferase/Renilla luciferase (LUC/REN) values of the empty pGreenII-SK vector on the *CitCHIL1* promoter were set as 1, and SE values were calculated from six replicates. Statistical significance was determined by one-way ANOVA and LSD test.

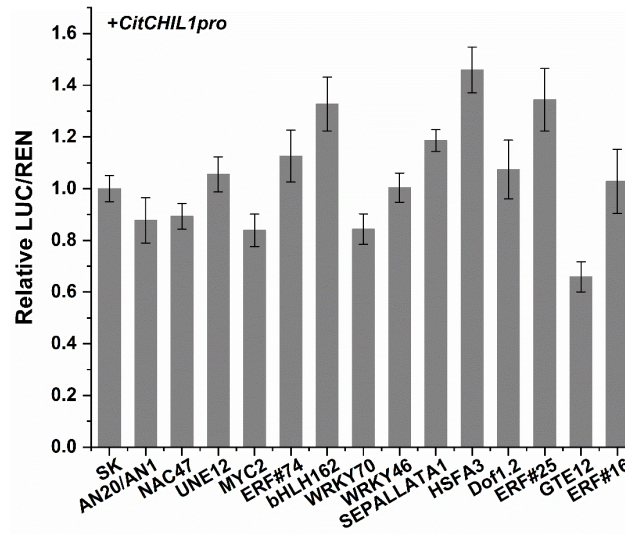

**Figure S8. Dual-luciferase assays and schematic representations of *CitCHIL1* promoter deletion.** The promoter was truncated to 1000bp length (pro1.0), 500bp (pro0.5) and 200bp (pro0.2), respectively. Error bars denote SE of the means (n = 6). Each TFs-promoter interaction was confirmed by three independent experiments and each experimental point had at least six biological replicates.

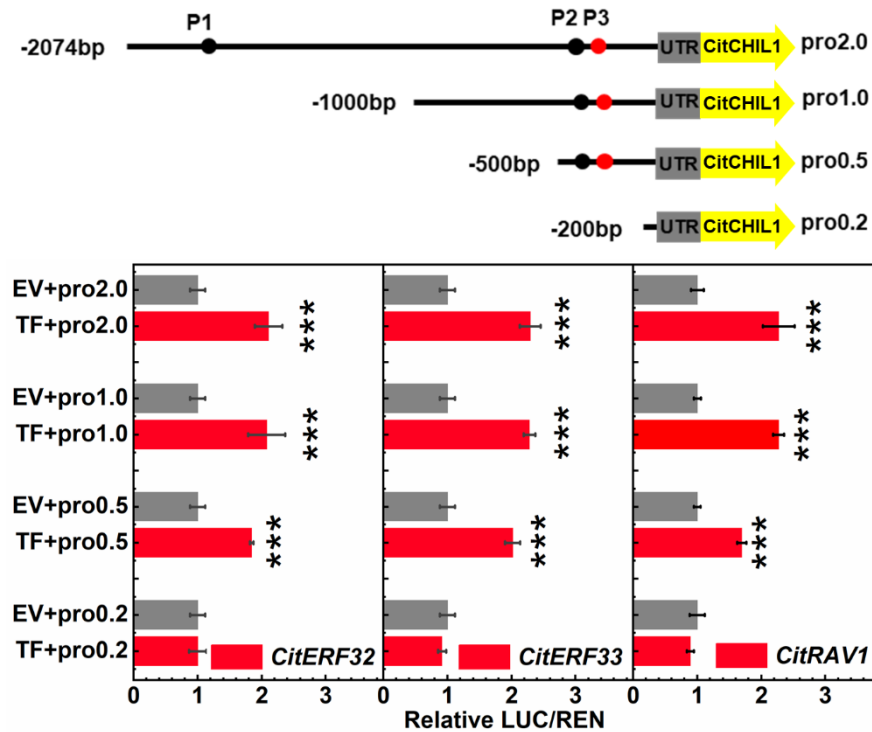



Figure S9. The original Western blot image of pull-down assay.

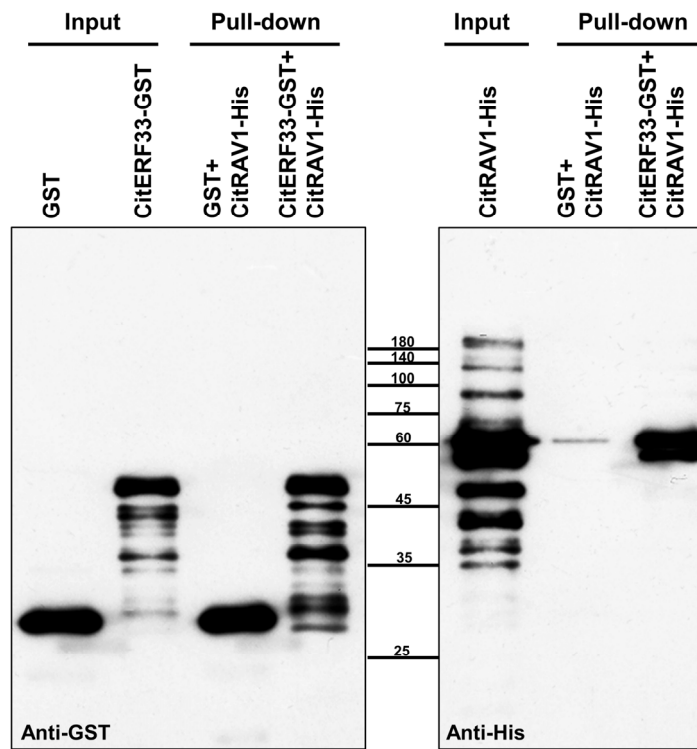

**Table S1. TFs screened by Y1H library screening.**

System: Matchmaker™ One-Hybrid Library Screening Kit (Clontech, Takara)

Library: Ougan Fruit and Leaves

Bait (Promoter Regions): Region A (-2074bp~-1355bp); Region B (-1436bp~-725bp); Region C (-806bp~-1bp)

Remarks: All the regions have self-activating effect (AbA: 250ng/ml)

| No. | Region of Promoter | RecName                                                               | Short Name | GenBank        | Gene ID           | Frequency |
|-----|--------------------|-----------------------------------------------------------------------|------------|----------------|-------------------|-----------|
| 1   | C                  | A20/AN1-like zinc finger family protein                               | AN20/AN1   | XM_006430173.2 | Ciclev10012937m.g | 1         |
| 2   | C                  | NAC domain containing protein 47                                      | NAC47      | XM_006478987.3 | Ciclev10020717m.g | 1         |
| 3   | C                  | basic helix-loop-helix (bHLH) DNA-binding superfamily protein (UNE12) | UNE12      | XM_025096319.1 | Ciclev10001768m.g | 1         |
| 4   | C                  | Basic helix-loop-helix (bHLH) DNA-binding family protein MYC2         | MYC2       | XM_006491671.3 | Ciclev10011214m.g | 1         |
| 5   | B                  | ethylene-responsive element binding factor 13                         | ERF#74     | XM_006445353.2 | Ciclev10022734m.g | 1         |
| 6   | B                  | basic helix-loop-helix (bHLH) DNA-binding superfamily protein 162     | bHLH162    | XM_006447229.2 | Ciclev10016466m.g | 2         |
| 7   | B                  | WRKY DNA-binding protein 70                                           | WRKY70     | XM_006435880.2 | Ciclev10032192m.g | 1         |
| 8   | B                  | WRKY DNA-binding protein 46                                           | WRKY46     | XM_006444813.2 | Ciclev10020744m.g | 1         |
| 9   | B                  | K-box region and MADS-box transcription factor family protein         | SEPALLATA1 | XM_006430886.2 | Ciclev10012593m.g | 1         |
| 10  | B                  | heat shock transcription factor A3                                    | HSFA3      | XR_002904938.1 | Ciclev10011698m.g | 1         |
| 11  | C                  | Citrus clementina dof zinc finger protein DOF1.2                      | DOF1.2     | XM_006434360.2 | Ciclev10002179m.g | 1         |
| 12  | C                  | Citrus clementina ethylene-responsive transcription factor ERF023     | ERF#25     | XM_006441744.2 | Ciclev10022438m.g | 1         |
| 13  | C                  | Citrus clementina transcription factor GTE12                          | GTE12      | XM_006449532.2 | Ciclev10014673.g  | 1         |
| 14  | C                  | C-repeat/DRE binding factor 2                                         | ERF#16     | XM_006440466.2 | Ciclev10021923.g  | 1         |

**Table S2. Potential TFs predicted to interact with CitCHIL promoter. (Prediction by PlantTFDB)**<sup>a</sup> The data are presented as means±SE (n = 3).<sup>b</sup> Correlation coefficient (with *CitCHIL*); The Linear regression analyses between *CitCHIL* expression and TFs expression were conducted by OriginPro with significant differences obtained by *F*-test (ANOVA). \*, *p* < 0.05; \*\*, *p* < 0.01<sup>c</sup> The AP2/ERF family genes are named according to the previous report (Xie et al., 2014).<sup>d</sup> MYB and MYB-related genes are with pale yellow background.

| No. | tracking_id       | subfamily        | FPKM value             |              |              |              | r <sup>b</sup> | Short Name                     |
|-----|-------------------|------------------|------------------------|--------------|--------------|--------------|----------------|--------------------------------|
|     |                   |                  | S1                     | S3           | S5           | S7           |                |                                |
| 1   | Ciclev10012205m.g | bZIP             | 5.45±0.69 <sup>a</sup> | 0.65±0.15    | 0.34±0.14    | 0.42±0.03    | 0.9941**       | <i>CitABF2</i>                 |
| 2   | Ciclev10021911m.g | MIKC_MADS        | 41.45±2.45             | 9.99±2       | 8.42±0.53    | 8.38±0.7     | 0.9932**       | <i>CitAGL6</i>                 |
| 3   | Ciclev10005549m.g | ERF              | 1.92±0.3               | 0.06±0.03    | 0.15±0.08    | 0.09±0.05    | 0.9931**       | <i>CitERF32</i> <sup>c</sup>   |
| 4   | Ciclev10002280m.g | ERF              | 4.83±0.86              | 0.25±0.07    | 0.21±0.11    | 0.11±0.03    | 0.9931**       | <i>CitERF33</i> <sup>c</sup>   |
| 5   | Ciclev10025111m.g | AP2              | 13.92±1.34             | 1.41±0.23    | 0.5±0.12     | 0.49±0.11    | 0.9917**       | <i>CitAP2-5</i> <sup>c</sup>   |
| 6   | Ciclev10001165m.g | E2F/DP           | 2.27±0.34              | 0.93±0.25    | 0.99±0.32    | 1.24±0.2     | 0.9907         | (did not get full-length gene) |
| 7   | Ciclev10015354m.g | BBR-BPC          | 133.84±3               | 46.74±0.37   | 33.85±3.29   | 38.44±0.87   | 0.9902         | (did not get full-length gene) |
| 8   | Ciclev10032076m.g | bZIP             | 51.1±2.1               | 14.44±0.62   | 18.77±1.85   | 26.07±2.17   | 0.9743*        | <i>CitRF2b</i>                 |
| 9   | Ciclev10012003m.g | MYB <sup>d</sup> | 9.4±0.2                | 5.49±0.13    | 4.04±0.48    | 4.88±0.24    | 0.9716*        | <i>CitMYB44</i>                |
| 10  | Ciclev10016427m.g | MIKC_MADS        | 188.84±5.96            | 107.01±10.88 | 81.79±3.42   | 74.67±2.58   | 0.9484         | <i>CitMADS1</i>                |
| 11  | Ciclev10015986m.g | MYB              | 7.89±5.56              | 3.8±0.3      | 4.95±0.52    | 5.37±1.2     | 0.9373         | <i>CitMYB108</i>               |
| 12  | Ciclev10020499m.g | C2H2             | 9.44±0.75              | 4.71±0.41    | 2.2±0.38     | 1.53±0.06    | 0.9034         | <i>CitAZF2</i>                 |
| 13  | Ciclev10031846m.g | RAV              | 819.02±39.76           | 346.98±80.08 | 389.88±35.26 | 143.68±20.21 | 0.8857         | <i>CitRAV1</i> <sup>c</sup>    |
| 14  | Ciclev10015695m.g | Trihelix         | 9.6±0.61               | 5.78±0.34    | 3.33±0.28    | 2.74±0.12    | 0.8854         | <i>CitGT-2</i>                 |
| 15  | Ciclev10032279m.g | HD-ZIP           | 32.82±1.92             | 10.05±0.79   | 9.42±1.45    | 23.02±0.63   | 0.8782         | <i>CitATHB-13</i>              |
| 16  | Ciclev10005233m.g | bHLH             | 33.24±3.41             | 19.31±3.65   | 5.29±0.7     | 16.32±1.86   | 0.8751         | <i>CitbHLH130</i>              |
| 17  | Ciclev10005411m.g | MYB_related      | 58.44±3.38             | 32.66±3.48   | 37.41±5.9    | 20.39±1.51   | 0.8450         | <i>CitREVEILLE6</i>            |
| 18  | Ciclev10031028m.g | bHLH             | 1.41±0.21              | 0.79±0.24    | 0.18±0.04    | 0.08±0.04    | 0.8389         | (did not get full-length gene) |
| 19  | Ciclev10019949m.g | Dof              | 14.12±1.26             | 6.49±1.22    | 2±0.32       | 9.71±1.51    | 0.8378         | <i>CitDof5.2</i>               |
| 20  | Ciclev10001249m.g | bHLH             | 15±0.89                | 4.92±0.63    | 9.35±0.73    | 11.42±0.97   | 0.7947         | <i>CitbHLH74</i>               |
| 21  | Ciclev10026245m.g | MYB_related      | 23.38±1.16             | 20.31±3.02   | 13.96±1.33   | 15.06±0.55   | 0.7718         | <i>CitSMH3</i>                 |
| 22  | Ciclev10006161m.g | GATA             | 25.94±1.12             | 21.69±3.75   | 9.21±0.57    | 15.73±1.4    | 0.7299         | <i>CitGATA16</i>               |
| 23  | Ciclev10021073m.g | ERF              | 2.56±0.2               | 1.77±0.08    | 0.97±0.15    | 0.08±0.01    | 0.7112         | <i>CitERF48</i> <sup>c</sup>   |
| 24  | Ciclev10000593m.g | Trihelix         | 53.44±2.2              | 40.24±0.19   | 22.92±3.9    | 47.19±3.16   | 0.6937         |                                |
| 25  | Ciclev10026061m.g | Dof              | 53.35±0.78             | 46.46±6.1    | 21.91±6.38   | 8.79±0.94    | 0.6186         |                                |
| 26  | Ciclev10021100m.g | Dof              | 31.59±1.09             | 19.99±4.43   | 28.96±1.75   | 28.68±1.87   | 0.5817         |                                |

|    |                   |             |              |              |              |             |         |
|----|-------------------|-------------|--------------|--------------|--------------|-------------|---------|
| 27 | Ciclev10026013m.g | HD-ZIP      | 302.75±12.37 | 292.92±23.02 | 201.49±20.2  | 168.24±5.92 | 0.5729  |
| 28 | Ciclev10030860m.g | ARF         | 14.07±1.34   | 6.72±0.63    | 8.59±0.34    | 14.94±0.94  | 0.5643  |
| 29 | Ciclev10032039m.g | Dof         | 3.06±0.13    | 3.06±0.24    | 1.3±0.45     | 1.07±0.13   | 0.5466  |
| 30 | Ciclev10010579m.g | NAC         | 3.23±0.14    | 3.18±0.21    | 1.16±0.34    | 0.61±0.12   | 0.5447  |
| 31 | Ciclev10007882m.g | WRKY        | 41.32±1.59   | 40.69±1.08   | 27.43±3.01   | 36.21±1.71  | 0.5439  |
| 32 | Ciclev10031135m.g | bHLH        | 8.63±0.72    | 3.42±0.5     | 6.82±0.88    | 8.65±0.74   | 0.5199  |
| 33 | Ciclev10025816m.g | ERF         | 616.7±2.93   | 404.93±39.1  | 613.99±77.98 | 369.72±6.13 | 0.5166  |
| 34 | Ciclev10004533m.g | C2H2        | 24.12±0.83   | 24.95±1.36   | 11.97±1.66   | 15.68±1.35  | 0.5159  |
| 35 | Ciclev10005387m.g | MYB         | 3.89±2.04    | 0.55±0.17    | 4.03±1.43    | 0.67±0.12   | 0.4965  |
| 36 | Ciclev10000756m.g | MYB         | 9.56±0.25    | 8.98±0.71    | 8.06±1.36    | 5.29±0.09   | 0.4881  |
| 37 | Ciclev10001051m.g | bZIP        | 15.94±1.19   | 16.88±1.49   | 7.86±1.2     | 7.61±0.83   | 0.4875  |
| 38 | Ciclev10017466m.g | GRAS        | 36.23±0.96   | 41.7±0.09    | 9.63±3.28    | 14.73±1.44  | 0.4388  |
| 39 | Ciclev10031622m.g | bHLH        | 265.9±16.58  | 68.75±11.23  | 301.89±98.01 | 24.95±1.49  | 0.4138  |
| 40 | Ciclev10031405m.g | MYB         | 2.36±0.2     | 3.16±0.32    | 0.4±0.12     | 0.24±0.04   | 0.3494  |
| 41 | Ciclev10021268m.g | MYB         | 4.15±0.27    | 4.56±0.41    | 1.65±0.59    | 4.02±0.37   | 0.3303  |
| 42 | Ciclev10022568m.g | MIKC_MADS   | 0.49±0.06    | 0.61±0.26    | 0.27±0.01    | 0.05±0.03   | 0.2952  |
| 43 | Ciclev10005102m.g | MYB         | 0.54±0.54    | 0.29±0.05    | 0.48±0.11    | 0.64±0.10   | 0.2822  |
| 44 | Ciclev10008192m.g | bHLH        | 148.79±7.03  | 89.72±6.08   | 180.33±16.65 | 85.54±10.46 | 0.2596  |
| 45 | Ciclev10026414m.g | HD-ZIP      | 72.67±34.66  | 100.39±15.6  | 43.07±7.09   | 15.2±5.28   | 0.2165  |
| 46 | Ciclev10012016m.g | C2H2        | 37.17±0.67   | 43.26±3.54   | 27.5±1.62    | 33.11±2.03  | 0.1998  |
| 47 | Ciclev10021278m.g | Dof         | 1.56±0.35    | 2.52±0.46    | 0.36±0.12    | 0.47±0.03   | 0.1945  |
| 48 | Ciclev10032167m.g | MYB_related | 6.64±0.51    | 7.54±0.8     | 3±1.22       | 9.24±1.79   | 0.0912  |
| 49 | Ciclev10007904m.g | WRKY        | 37.32±0.23   | 36.78±1.82   | 28.25±6.72   | 47.6±0.26   | 0.0793  |
| 50 | Ciclev10009593m.g | ERF         | 24.72±3.45   | 3.84±1.3     | 10.11±2.87   | 63.01±6.87  | 0.0717  |
| 51 | Ciclev10027890m.g | bHLH        | 17.58±0.37   | 17.6±0.77    | 12.7±2.68    | 23.03±0.26  | 0.0687  |
| 52 | Ciclev10012360m.g | C3H         | 25.8±1.32    | 24.15±1.61   | 32.16±4.66   | 15.63±0.71  | 0.0412  |
| 53 | Ciclev10008390m.g | TCP         | 28.61±1.19   | 38.93±4.23   | 19.15±2.12   | 29.08±1.98  | -0.0028 |
| 54 | Ciclev10021151m.g | BES1        | 43.35±1.42   | 36.53±2.06   | 59.61±1.43   | 31.35±0.16  | -0.0430 |
| 55 | Ciclev10028398m.g | MYB         | 2.91±0.61    | 7.06±0.53    | 1.15±0.41    | 1.29±0.05   | -0.0688 |
| 56 | Ciclev10001679m.g | G2-like     | 4.57±0.59    | 3.37±0.3     | 8.75±0.95    | 1.51±0.09   | -0.0775 |
| 57 | Ciclev10020263m.g | bZIP        | 35.4±0.19    | 23.97±0.78   | 64.35±15.25  | 19.92±1.02  | -0.0894 |
| 58 | Ciclev10032412m.g | bHLH        | 13.21±0.65   | 5.82±0.06    | 35.92±8.04   | 3.94±0.24   | -0.1388 |

|    |                   |           |              |              |                |               |         |
|----|-------------------|-----------|--------------|--------------|----------------|---------------|---------|
| 59 | Ciclev10032192m.g | WRKY      | 85.8±6.98    | 250.32±34.51 | 50.97±8.37     | 28.92±6.08    | -0.1532 |
| 60 | Ciclev10031606m.g | NAC       | 36.82±0.41   | 56.15±2.23   | 34.58±1.39     | 29.88±1.11    | -0.1849 |
| 61 | Ciclev10028259m.g | AP2       | 58.75±2.19   | 54.52±1.4    | 150.03±31.26   | 21.31±0.96    | -0.2300 |
| 62 | Ciclev10005376m.g | MYB       | 5.28±0.44    | 11.01±0.97   | 1.6±0.66       | 12.99±1.94    | -0.2364 |
| 63 | Ciclev10008096m.g | G2-like   | 1.53±0.02    | 3.27±0.62    | 1.04±0.32      | 1.71±0.21     | -0.2414 |
| 64 | Ciclev10005820m.g | ERF       | 3.63±2.42    | 21.95±6.48   | 1.86±0.83      | 1.36±0.17     | -0.2657 |
| 65 | Ciclev10023345m.g | ERF       | 35.7±3.51    | 0.7±0.54     | 266.01±122.84  | 1.64±0.27     | -0.2749 |
| 66 | Ciclev10005366m.g | TCP       | 7.2±0.41     | 5.96±0.89    | 9.93±0.76      | 30.58±1.74    | -0.2755 |
| 67 | Ciclev10032816m.g | WRKY      | 202.13±6.38  | 182.37±4.69  | 240.72±54.46   | 248.06±6.64   | -0.3113 |
| 68 | Ciclev10011214m.g | bHLH      | 112.98±0.98  | 226.96±26.74 | 179.56±4.01    | 54.09±2.48    | -0.3459 |
| 69 | Ciclev10021174m.g | WRKY      | 51.58±1.85   | 41.43±0.63   | 363.58±107.38  | 35.45±1.15    | -0.3604 |
| 70 | Ciclev10026105m.g | WRKY      | 37.35±4.19   | 23.82±10.44  | 599.35±228.13  | 3.62±0.67     | -0.3613 |
| 71 | Ciclev10032029m.g | ERF       | 63.91±5.29   | 27.47±8.96   | 1238.03±304.78 | 17.96±2.32    | -0.3657 |
| 72 | Ciclev10001400m.g | BBR-BPC   | 35.96±1.68   | 39.72±1.08   | 54.51±6.45     | 31.02±1.07    | -0.3683 |
| 73 | Ciclev10020314m.g | bZIP      | 47.92±4.44   | 43.57±4.87   | 217.5±20.39    | 42.13±5.07    | -0.3701 |
| 74 | Ciclev10014642m.g | WRKY      | 37.57±9.45   | 29.51±10.28  | 574.76±94.64   | 41.27±6.86    | -0.3903 |
| 75 | Ciclev10026433m.g | MIKC_MADS | 1.95±0.42    | 3.96±0.46    | 8.28±0.92      | 29.41±4.92    | -0.3941 |
| 76 | Ciclev10019339m.g | bHLH      | 81.69±5.69   | 109.85±0.56  | 235.52±13.71   | 55.09±2.29    | -0.4024 |
| 77 | Ciclev10008836m.g | WRKY      | 150.66±0.72  | 233.85±34.44 | 735.33±137.44  | 98.96±3.18    | -0.4238 |
| 78 | Ciclev10032507m.g | MIKC_MADS | 446.99±17.46 | 606.47±16.35 | 1030.18±25.47  | 2437.93±57.56 | -0.4279 |
| 79 | Ciclev10020248m.g | bHLH      | 20.96±0.5    | 31.33±3.21   | 26.72±2.72     | 62.91±2.18    | -0.4326 |
| 80 | Ciclev10033384m.g | WRKY      | 0.3±0.03     | 1.33±0.76    | 10.68±2.73     | 0.09±0.04     | -0.4342 |
| 81 | Ciclev10028930m.g | ERF       | 7.65±3.07    | 104.04±36.88 | 975.04±93.81   | 22.07±3       | -0.4495 |
| 82 | Ciclev10002294m.g | ERF       | 1.18±0.14    | 10.32±3.44   | 533.52±55.49   | 72.43±6.43    | -0.4535 |
| 83 | Ciclev10001333m.g | bZIP      | 24.84±0.71   | 30.4±1.96    | 25.46±1.78     | 36.84±0.64    | -0.4642 |
| 84 | Ciclev10028435m.g | bZIP      | 81±1.69      | 116.68±14.39 | 81.57±13.72    | 141.54±8.67   | -0.4715 |
| 85 | Ciclev10001978m.g | BES1      | 68.82±2      | 86.73±4.42   | 68.6±3.15      | 77.47±5.2     | -0.4877 |
| 86 | Ciclev10019816m.g | bHLH      | 38.33±0.9    | 46.51±1.27   | 47.07±3.39     | 35.61±0.66    | -0.4924 |
| 87 | Ciclev10000188m.g | Nin-like  | 4.92±0.2     | 10.52±0.65   | 5.02±1.03      | 7.94±0.24     | -0.5169 |
| 88 | Ciclev10027178m.g | MYB       | 0.02±0.02    | 0.33±0.23    | 2.51±0.43      | 0.4±0.05      | -0.5201 |
| 89 | Ciclev10032012m.g | WRKY      | 9.56±4.58    | 24.61±2.78   | 23.6±2.55      | 62.03±2.95    | -0.5288 |
| 90 | Ciclev10015261m.g | EIL       | 11.76±0.74   | 14.72±1.39   | 15.64±2.43     | 11.07±0.52    | -0.5436 |

|     |                   |           |             |               |                |              |         |
|-----|-------------------|-----------|-------------|---------------|----------------|--------------|---------|
| 91  | Ciclev10012152m.g | MYB       | 12.18±1.11  | 14.8±0.81     | 93.03±15.77    | 45.51±2.35   | -0.5456 |
| 92  | Ciclev10001508m.g | TALE      | 0.01±0.01   | 0.38±0.08     | 0.99±0.24      | 2.2±0.22     | -0.5489 |
| 93  | Ciclev10023857m.g | ERF       | 0.27±0.18   | 0.23±0.00     | 2.74±0.22      | 2.48±0.72    | -0.5502 |
| 94  | Ciclev10002297m.g | C2H2      | 373.3±91.53 | 981.49±269.14 | 2483.93±162.91 | 514.63±68.93 | -0.5614 |
| 95  | Ciclev10020323m.g | bHLH      | 0.06±0.02   | 0.96±0.13     | 0.54±0.16      | 2.15±0.08    | -0.5705 |
| 96  | Ciclev10026197m.g | HD-ZIP    | 74.89±0.85  | 122.18±9.18   | 240.6±49.51    | 92.08±3.32   | -0.5788 |
| 97  | Ciclev10032490m.g | MIKC_MADS | 7.51±0.5    | 19.37±2.17    | 32.47±0.69     | 61.91±2.39   | -0.5857 |
| 98  | Ciclev10018094m.g | Dof       | 5.98±0.52   | 15.71±0.28    | 36.59±9.38     | 9.78±0.19    | -0.6037 |
| 99  | Ciclev10005220m.g | ERF       | 11.94±0.39  | 47.44±4.74    | 54.56±2.43     | 9.34±0.63    | -0.6129 |
| 100 | Ciclev10012265m.g | MYB       | 2.16±0.4    | 5.75±0.35     | 20.43±4.13     | 7.69±1       | -0.6195 |
| 101 | Ciclev10012135m.g | bHLH      | 32.29±0.72  | 41.37±1.07    | 36.19±2.02     | 33.78±2.2    | -0.6445 |
| 102 | Ciclev10020967m.g | MYB       | 13.43±0.58  | 24.48±1.79    | 70.37±7.15     | 78.42±6.1    | -0.6518 |
| 103 | Ciclev10020053m.g | bHLH      | 10.82±1.4   | 47.46±1.32    | 24.13±2.17     | 21.55±2.64   | -0.6773 |
| 104 | Ciclev10025735m.g | bHLH      | 7.21±1.19   | 7.58±0.56     | 8.81±1.06      | 8.9±1.04     | -0.6855 |
| 105 | Ciclev10026107m.g | MYB       | 44.08±5.72  | 84.56±1.37    | 176.67±20.99   | 86.27±8.35   | -0.6883 |
| 106 | Ciclev10009761m.g | WRKY      | 10.83±1.22  | 54.67±2.76    | 64.08±9.52     | 14.79±0.98   | -0.6907 |
| 107 | Ciclev10001159m.g | bZIP      | 57.26±1.57  | 69.76±9.42    | 96.06±5.34     | 71.54±3.32   | -0.7168 |
| 108 | Ciclev10005701m.g | ERF       | 58.91±4.37  | 124.94±18.52  | 96.2±11.37     | 158.32±12    | -0.7401 |
| 109 | Ciclev10021877m.g | HD-ZIP    | 30.91±3.83  | 240.69±35.99  | 121.58±36.93   | 110.65±9.44  | -0.7508 |
| 110 | Ciclev10026336m.g | Dof       | 4.62±0.69   | 59.88±6.96    | 97.56±13.31    | 25.68±2.58   | -0.7555 |
| 111 | Ciclev10032020m.g | bHLH      | 31.1±1.53   | 38.78±0.95    | 36.64±0.17     | 43.57±2.08   | -0.7710 |
| 112 | Ciclev10005629m.g | MYB       | 3.5±2.22    | 41.39±11.24   | 43.98±4.26     | 12.76±2.66   | -0.7801 |
| 113 | Ciclev10009361m.g | ERF       | 23.88±1.74  | 134.16±15.1   | 227.27±3.38    | 95.93±6.05   | -0.8098 |
| 114 | Ciclev10005658m.g | GATA      | 24.43±2.35  | 57.93±4.51    | 85.08±1.36     | 48.55±2.92   | -0.8331 |
| 115 | Ciclev10028908m.g | MYB       | 14.36±1     | 26.48±1.06    | 43.26±3.18     | 33.24±2.21   | -0.8387 |
| 116 | Ciclev10031946m.g | MYB       | 5.08±0.51   | 14.5±0.68     | 17.59±2.85     | 9.32±0.26    | -0.8423 |
| 117 | Ciclev10032059m.g | ERF       | 16.54±1.46  | 44.8±2.29     | 31.06±5.71     | 41.39±2.54   | -0.8612 |
| 118 | Ciclev10015049m.g | WRKY      | 46.36±1.18  | 80.37±3.91    | 67.16±1.6      | 64.23±2.87   | -0.8813 |
| 119 | Ciclev10025963m.g | bZIP      | 40.88±1.97  | 93.18±4.32    | 82.19±1.08     | 64.29±4.18   | -0.8892 |
| 120 | Ciclev10015893m.g | G2-like   | 46.76±0.92  | 73.38±0.14    | 65.77±2.5      | 75.11±4.78   | -0.9213 |
| 121 | Ciclev10026457m.g | MIKC_MADS | 0.83±0.03   | 1.85±0.1      | 1.92±0.09      | 2.19±0.22    | -0.9434 |
| 122 | Ciclev10019585m.g | bHLH      | 8.17±0.68   | 24.62±1.97    | 28.85±3.35     | 23.5±1.07    | -0.9828 |

|                                                                                                                                                                                                |                   |           |            |           |            |            |              |
|------------------------------------------------------------------------------------------------------------------------------------------------------------------------------------------------|-------------------|-----------|------------|-----------|------------|------------|--------------|
| 123                                                                                                                                                                                            | Ciclev10004984m.g | G2-like   | 17.49±1.53 | 48.6±6.49 | 44.58±3.13 | 45.12±5.27 | -0.9895      |
| TFs (No.124 - No.148) with low FPKM values were filtered out.<br>(Conditions: The average of the FPKM value of any stage is 0, or the sum of the FPKM value of the four stages is less than 1) |                   |           |            |           |            |            |              |
| 124                                                                                                                                                                                            | Ciclev10013851m.g | AP2       | 0±0        | 0±0       | 0±0        | 0±0        |              |
| 125                                                                                                                                                                                            | Ciclev10013385m.g | bZIP      | 0.14±0.09  | 0±0       | 0.04±0.02  | 0.05±0.02  |              |
| 126                                                                                                                                                                                            | Ciclev10032777m.g | bZIP      | 1.87±0.78  | 2.25±0.54 | 0±0        | 0.16±0.12  |              |
| 127                                                                                                                                                                                            | Ciclev10013814m.g | Dof       | 0±0        | 0±0       | 0±0        | 0±0        |              |
| 128                                                                                                                                                                                            | Ciclev10022244m.g | ERF       | 0±0        | 0±0       | 0±0        | 0±0        |              |
| 129                                                                                                                                                                                            | Ciclev10033578m.g | ERF       | 0±0        | 0±0       | 0.04±0.04  | 0±0        |              |
| 130                                                                                                                                                                                            | Ciclev10006861m.g | ERF       | 0±0        | 0±0       | 0.04±0.04  | 0.02±0.02  |              |
| 131                                                                                                                                                                                            | Ciclev10017494m.g | ERF       | 0.32±0.1   | 0.07±0.03 | 0±0        | 0±0        |              |
| 132                                                                                                                                                                                            | Ciclev10017910m.g | LBD       | 0.09±0.09  | 0.1±0.05  | 0.04±0.04  | 0.09±0.05  |              |
| 133                                                                                                                                                                                            | Ciclev10022371m.g | LBD       | 1.86±0.23  | 0.16±0.02 | 0±0        | 0±0        |              |
| 134                                                                                                                                                                                            | Ciclev10021992m.g | LBD       | 0.29±0.04  | 0.12±0.04 | 0.21±0.05  | 0.21±0.11  |              |
| 135                                                                                                                                                                                            | Ciclev10002471m.g | MIKC_MADS | 0.15±0.1   | 0±0       | 0±0        | 0±0        |              |
| 136                                                                                                                                                                                            | Ciclev10006752m.g | MYB       | 0±0        | 0±0       | 0.03±0.03  | 0.04±0.02  |              |
| 137                                                                                                                                                                                            | Ciclev10003958m.g | MYB       | 0±0        | 0.02±0.02 | 0.06±0.06  | 0±0        |              |
| 138                                                                                                                                                                                            | Ciclev10013466m.g | MYB       | 3.01±0.48  | 0.7±0.07  | 0.14±0.09  | 0±0        |              |
| 139                                                                                                                                                                                            | Ciclev10033941m.g | MYB       | 0.11±0.04  | 0.33±0.11 | 0.11±0.07  | 0.1±0.03   |              |
| 140                                                                                                                                                                                            | Ciclev10017764m.g | MYB       | 0±0        | 0±0       | 0±0        | 0±0        |              |
| 141                                                                                                                                                                                            | Ciclev10026023m.g | MYB       | 0.06±0.04  | 0.16±0.1  | 0.05±0.03  | 0.17±0.07  |              |
| 142                                                                                                                                                                                            | Ciclev10023756m.g | MYB       | 0±0        | 0±0       | 0±0        | 0±0        | <i>MYBF2</i> |
| 143                                                                                                                                                                                            | Ciclev10008921m.g | MYB       | 0.16±0.06  | 0.1±0.08  | 1±0.33     | 0±0        |              |
| 144                                                                                                                                                                                            | Ciclev10013455m.g | MYB       | 0±0        | 0±0       | 0±0        | 0.07±0.07  | <i>ruby1</i> |
| 145                                                                                                                                                                                            | Ciclev10024588m.g | NAC       | 0±0        | 0±0       | 0±0        | 0±0        |              |
| 146                                                                                                                                                                                            | Ciclev10006623m.g | NAC       | 0.04±0.02  | 0.04±0.02 | 0±0        | 0±0        |              |
| 147                                                                                                                                                                                            | Ciclev10024257m.g | WRKY      | 0.27±0.13  | 0±0       | 0±0        | 0±0        |              |
| 148                                                                                                                                                                                            | Ciclev10014984m.g | WRKY      | 0.08±0.04  | 0.39±0.06 | 0.09±0.05  | 0.07±0.04  |              |



**Table S3. Primers used in the present study.**

| Primer Name                                                | Sequence (5' to 3')                         |
|------------------------------------------------------------|---------------------------------------------|
| <b>For promoter and gene cloning (into pMD19-T vector)</b> |                                             |
| CitCHIL1-FL-FP                                             | ATGGCCACTGAAGTTGTAATGG                      |
| CitCHIL1-FL-RP                                             | CGGCTCATTGATAACTCAGCTG                      |
| CitCHI-FL-FP                                               | ATGAATCCCTCACCGTCCGTCA                      |
| CitCHI-FL-RP                                               | CGCGCTCATTTTCATCTTATCACTAG                  |
| CitCHS1-FL-FP                                              | ATGGTGACCGTCGATGAAGTTCC                     |
| CitCHS1-FL-RP                                              | TTAAGCAGCGGCAACACTGTGG                      |
| CitCHS2-FL-FP                                              | ATGGCAACCGTTCAAGAGATC                       |
| CitCHS2-FL-RP                                              | TCAAGCTTTGATGGGGACTG                        |
| CHIL1pro-FL-FP                                             | GATTTCAAGACCATGACCATTACCC                   |
| CHIL1pro-FL-RP                                             | CGGGGTAATCTTTAGTGGGAAATTATTGG               |
| <b>For quantitative RT-PCR</b>                             |                                             |
| CitCHIL1-Q-FP                                              | GCAGCTCTGCGCTTTCTAAT                        |
| CitCHIL1-Q-RP                                              | TCTTGAAGGACCTTAGCAAAGC                      |
| CitCHI-Q-FP                                                | AATGCTGATGTCCCTGACCAAC                      |
| CitCHI-Q-RP                                                | CAGTAGTGGCTAAGTGGCTTCC                      |
| CitCHIL2-Q-FP                                              | TGAACTGCGAGAACAGAACCAA                      |
| CitCHIL2-Q-RP                                              | CTCCTTTGCCTCCTCTTCG                         |
| CitFAP1-Q-FP                                               | GCATACGCTCTGTACGGAGT                        |
| CitFAP1-Q-RP                                               | GCTCAATCACAGATCCCTTAGG                      |
| CitFAP2-Q-FP                                               | CAACGCTGTGAAGGATGTCT                        |
| CitFAP2-Q-RP                                               | TAGGTGCAGTCCATAGCAAGGA                      |
| CitFAP3-Q-FP                                               | CTGTCCACATTCCGAAGCATCT                      |
| CitFAP3-Q-RP                                               | TGGCAACCCATCTCCTGAAATG                      |
| CitCHS1-Q-FP                                               | GGCTTAGAGACCGCAGGAGAA                       |
| CitCHS1-Q-RP                                               | TGAGTCAAACCAACCACACCAA                      |
| CitCHS2-Q-FP                                               | TCACCGTCGAGACCGTTGT                         |
| CitCHS2-Q-RP                                               | AACCTTCACACGATCAACCAAT                      |
| CitCHIL1-Qcds-FP                                           | GCAACATCCCCTACTGCTGA                        |
| CitCHIL1-Qcds-RP                                           | CCTTGCTCCACCCAAGTACC                        |
| AtCHIL-Q-FP                                                | AGTTCACTGCGATCGGAGTT                        |
| AtCHIL-Q-RP                                                | TCCTCAGCCAAACGATCTCT                        |
| AtEF1 $\alpha$ -Q-FP                                       | TGAGCACGCTCTTCTTGCTTTCA                     |
| AtEF1 $\alpha$ -Q-RP                                       | GGTGGTGGCATCCATCTTGTTACA                    |
| CitActin-FP                                                | CATCCCTCAGCACCTTCC                          |
| CitActin-RP                                                | CCAACCTTAGCACTTCTCC                         |
| CitRAV1-Q-FP                                               | TGTTTCATGACGGTTGAGTTGG                      |
| CitRAV1-Q-RP                                               | GGGAAAGCAACAACACCACAA                       |
| CitERF32-Q-FP                                              | TATGCTGGGATGGCGTGAAG                        |
| CitERF32-Q-RP                                              | CCTGAAGAACCTTCCGTCCC                        |
| CitERF33-Q-FP                                              | GCACAGGCTAGCTCAAGGAA                        |
| CitERF33-Q-RP                                              | GGATTTCGGCCACCCATTTG                        |
| CitRAV1-cdsQ-FP                                            | TCTTGTGCTGGAACGTCCTC                        |
| CitRAV1-cdsQ-RP                                            | GCTCGTCGTTGTAAGTGTGC                        |
| <b>For subcellular localization (into 35S-eGFP vector)</b> |                                             |
| CitCHIL1-GFP-FP                                            | cggtaccgggatccATGGCCACTGAAGTTGTAATGG        |
| CitCHIL1-GFP-RP                                            | cgactctagaggatccTTTTGATAACTCAGCTGAGAGAG     |
| CitCHI-GFP-FP                                              | cggtaccgggatccATGAATCCCTCACCGTCC            |
| CitCHI-GFP-RP                                              | cgactctagaggatccTTTCATCTTATCACTAGTTACATTC   |
| CitCHS1-GFP-FP                                             | gagctcggtagaccgggatccATGGTGACCGTCGATGAAGTTC |
| CitCHS1-GFP-RP                                             | catgtcactctagaggatccAGCAGCGGCAACACTGTGG     |
| CitCHS2-GFP-FP                                             | cggtaccgggatccATGGCAACCGTTCAAGAGATCAG       |
| CitCHS2-GFP-RP                                             | cgactctagaggatccAGCTTTGATGGGGACTGTG         |
| CitRAV1-GFP-FP                                             | cggtaccgggatccATGAAAAGAGAAGAAATGGACGGA      |

|                                                                                    |                                                      |
|------------------------------------------------------------------------------------|------------------------------------------------------|
| CitRAV1-GFP-RP                                                                     | cgactctagaggatccCGAAGCTCCAATCATTCTTTGT               |
| CitERF32-GFP-FP                                                                    | cggtagccggggatccATGGAGAGTTACAAAAATCCCCA              |
| CitERF32-GFP-RP                                                                    | cgactctagaggatccGAAGTTCCAAATGGAGGTAGGCA              |
| CitERF33-GFP-FP                                                                    | cggtagccggggatccATGTCAAAAGCACTTATGGGTGG              |
| CitERF33-GFP-RP                                                                    | cgactctagaggatccAACGCACCACGGAGTCGG                   |
| <b>For recombinant protein constructs (into pET32a vector or pGEX-4t-1 vector)</b> |                                                      |
| CitCHIL1-His-FP                                                                    | acctgagctcATGGCCACTGAAGTTGTAATGG                     |
| CitCHIL1-His-RP                                                                    | cggcctcgagTTTTGATAACTCAGCTG                          |
| CitCHI-His-FP                                                                      | acctgaattcATGAATCCCTCACCGTCCGTCA                     |
| CitCHI-His-RP                                                                      | cggcctcgagTTTCATCTTATCACTAG                          |
| CitCHS1-His-FP                                                                     | acctgaattcATGGTGACCGTTCGATGAAGTTCG                   |
| CitCHS1-His-RP                                                                     | aatactcgagAGCAGCGGCAACTGTGG                          |
| CitCHS2-His-FP                                                                     | cgacgaattcATGGCAACCGTTCAAGAGATC                      |
| CitCHS2-His-RP                                                                     | attactcgagAGCTTTGATGGGGACTG                          |
| CitRAV1-His-FP                                                                     | gctgatatcgatccgaattcATGAAAAGAGAAGAAATGGACGGA         |
| CitRAV1-His-RP                                                                     | gtgggtggtggtgctcgagCGAAGCTCCAATCATTCTTTGTT           |
| CitERF32-His-FP                                                                    | gctgatatcgatccgaattcATGGAGAGTTACAAAAATCCCCA          |
| CitERF32-His-RP                                                                    | gtgggtggtggtgctcgagGAAGTTCCAAATGGAGGTAGGCA           |
| CitERF33-His-FP                                                                    | gctgatatcgatccgaattcATGTCAAAAGCACTTATGGGTGG          |
| CitERF33-His-RP                                                                    | gtgggtggtggtgctcgagAACGCACCACGGAGTCGG                |
| CitERF33-GST-FP                                                                    | gatctggtccgctggtatccATGTCAAAAGCACTTATGGGT            |
| CitERF33-GST-RP                                                                    | gtcacgatcgccgctcgagTCAAACGCACCACGGAGTCGG             |
| <b>For Y2H assays (into pGADT7 or pGBKT7 vector)</b>                               |                                                      |
| CitCHIL1-BD-FP                                                                     | aggaggacctgcatatgATGGCCACTGAAGTTGTAATGG              |
| CitCHIL1-BD-RP                                                                     | ggatccccgggaattcTCATTTTGATAACTCAGCTGAGAG             |
| CitCHI-AD-FP                                                                       | ggaggccagtggaattcATGAATCCCTCACCGTCC                  |
| CitCHI-AD-RP                                                                       | tcactcgagctcgagTCATTTTCATCTTATCACTAGTTACA            |
| CitCHS1-AD-FP                                                                      | ggaggccagtggaattcATGGTGACCGTTCGATGAAGT               |
| CitCHS1-AD-RP                                                                      | tcactcgagctcgagTTAAGCAGCGGCAACT                      |
| CitCHS2-AD-FP                                                                      | ggaggccagtggaattcATGGCAACCGTTCAAGAGATCAGA            |
| CitCHS2-AD-RP                                                                      | tcactcgagctcgagTCAAGCTTTGATGGGGACTGT                 |
| <b>For BiFC assays (into p2YN and p2YC vectors)</b>                                |                                                      |
| CitCHIL1-2YN-FP                                                                    | atttacgaacgatagttaattaaTATGGCCACTGAAGTTGTAATGGT      |
| CitCHIL1-2YN-RP                                                                    | acctctccactagtggcgcgccCTTTTGATAACTCAGCTGAGAGAGTATTG  |
| CitCHI-2YN-FP                                                                      | atttacgaacgatagttaattaaTATGAATCCCTCACCGTCCG          |
| CitCHI-2YN-RP                                                                      | acctctccactagtggcgcgccCTTTCATCTTATCACTAGTTACATTCAACA |
| CitCHS1-2YN-FP                                                                     | atttacgaacgatagttaattaaTATGGTGACCGTTCGATGAAGTTC      |
| CitCHS1-2YN-RP                                                                     | acctctccactagtggcgcgccCAGCAGCGGCAACTGTG              |
| CitCHS2-2YN-FP                                                                     | atttacgaacgatagttaattaaTATGGCAACCGTTCAAGAGATCA       |
| CitCHS2-2YN-RP                                                                     | acctctccactagtggcgcgccCAGCTTTGATGGGGACTGTG           |
| CitRAV1-2YN-FP                                                                     | atttacgaacgatagttaattaaTATGAAAAGAGAAGAAATGGACGGA     |
| CitRAV1-2YN-RP                                                                     | acctctccactagtggcgcgccCCGAAGCTCCAATCATTCTTTG         |
| CitERF32-2YN-FP                                                                    | atttacgaacgatagttaattaaTATGGAGAGTTACAAAAATCCCCA      |
| CitERF32-2YN-RP                                                                    | acctctccactagtggcgcgccCGAAGTTCCAAATGGAGGTAGG         |
| CitERF33-2YN-FP                                                                    | atttacgaacgatagttaattaaTATGTCAAAAGCACTTATGGGTGG      |
| CitERF33-2YN-RP                                                                    | acctctccactagtggcgcgccCAACGCACCACGGAGTCG             |
| <b>For LCI assays (into nLUC and cLUC vectors)</b>                                 |                                                      |
| CitCHIL1-nLUC-FP                                                                   | acgggggacgagctcggtaccATGGCCACTGAAGTTGTAATGGT         |
| CitCHIL1-nLUC-RP                                                                   | cgcgtacgagatctggtcgacTTTTGATAACTCAGCTGAGAGAGTATTG    |
| CitCHI-nLUC-FP                                                                     | acgggggacgagctcggtaccATGAATCCCTCACCGTCCG             |
| CitCHI-nLUC-RP                                                                     | cgcgtacgagatctggtcgacTTTCATCTTATCACTAGTTACATTCAACAG  |
| CitCHS1-nLUC-FP                                                                    | acgggggacgagctcggtaccATGGTGACCGTTCGATGAAGTTC         |
| CitCHS1-nLUC-RP                                                                    | cgcgtacgagatctggtcgacAGCAGCGGCAACTGTGG               |
| CitCHS2-nLUC-FP                                                                    | acgggggacgagctcggtaccATGGCAACCGTTCAAGAGATCA          |
| CitCHS2-nLUC-RP                                                                    | cgcgtacgagatctggtcgacAGCTTTGATGGGGACTGTG             |
| AtCHS-nLUC-FP                                                                      | acgggggacgagctcggtaccATGGTGATGGCTGGTGCTTC            |

|                                                                  |                                                      |
|------------------------------------------------------------------|------------------------------------------------------|
| AtCHS-nLUC-RP                                                    | cgcgtagagatctggtcgacGAGAGGAACGCTGTGCAAGACG           |
| CitCHIL1-cLUC-FP                                                 | tacgctcccgggcggtaccATGGCCACTGAAGTTGTAATGGT           |
| CitCHIL1-cLUC-RP                                                 | acgaaagctctgcaggtcgacTCATTTTGATAACTCAGCTGAGAGAGT     |
| CitCHI-cLUC-FP                                                   | tacgctcccgggcggtaccATGAATCCCTCACCGTCCG               |
| CitCHI-cLUC-RP                                                   | acgaaagctctgcaggtcgacTCATTTTCATCTTATCACTAGTTACATTCAA |
| CitCHS1-cLUC-FP                                                  | tacgctcccgggcggtaccATGGTGACCGTCGATGAAGTTC            |
| CitCHS1-cLUC-RP                                                  | acgaaagctctgcaggtcgacTTAAGCAGCGGCAACACTGTG           |
| CitCHS2-cLUC-FP                                                  | tacgctcccgggcggtaccATGGCAACCGTTCAAGAGATCA            |
| CitCHS2-cLUC-RP                                                  | acgaaagctctgcaggtcgacTCAAGCTTTGATGGGGACACTG          |
| AtCHS-cLUC-FP                                                    | tacgctcccgggcggtaccATGGTGATGGCTGGTGCTTC              |
| AtCHS-cLUC-RP                                                    | acgaaagctctgcaggtcgacTTAGAGAGGAACGCTGTGCAAG          |
| <b>For overexpression (into pBI121 vector)</b>                   |                                                      |
| CitCHIL1-pBI-FP                                                  | ggactctagaggatccATGGCCACTGAAGTTGTAATGG               |
| CitCHIL1-pBI-RP                                                  | gaccaccggggatccTTTTGATAACTCAGCTGAGAGAG               |
| CitRAV1-pBI-FP                                                   | ggactctagaggatccATGAAAAGAGAAGAAATGGACGGA             |
| CitRAV1-pBI-RP                                                   | gaccaccggggatccCGAAGCTCCAATCATTCTTTGT                |
| CitERF32-pBI-FP                                                  | ggactctagaggatccATGGAGAGTTACAAAAAATCCCCA             |
| CitERF32-pBI-RP                                                  | gaccaccggggatccGAAGTTCCAAATGGAGGTAGGCA               |
| CitERF33-pBI-FP                                                  | ggactctagaggatccATGTCAAAGCACTTATGGGTGG               |
| CitERF33-pBI-RP                                                  | gaccaccggggatccAACGCACCACGGAGTCGG                    |
| <b>For VIGS (into TRV2 vector)</b>                               |                                                      |
| CitCHIL1-TRV2                                                    | gcttgaattcCACCACCAAGCCGTTGAATC                       |
| CitCHIL1-TRV2                                                    | ggaaggtaccAACGATTTTCTCAAGGCGAG                       |
| <b>For dual-luciferase assays (into LUC vector or SK vector)</b> |                                                      |
| CHIL1pro-LUC-FP                                                  | ACTCGGATCCGATTTCAAGACCATGACCAT                       |
| CHIL1pro-LUC-RP                                                  | GCGGTCCATGGTAATCTTTAGTGGGAAATTA                      |
| AN20/AN1-SK-FP                                                   | cgggctgcaggaattcATGGCGGAGGAGCACAGATTC                |
| AN20/AN1-SK-RP                                                   | cgggccccctcgagTCAAATCTTCTCGAGCTTCTCCGC               |
| NAC47-SK-FP                                                      | cgggctgcaggaattcATGGTTTGATAAAGAACCCGG                |
| NAC47-SK-RP                                                      | cgggccccctcgagTCATCCTTGAAACTGAAGATGTGGG              |
| UNE12-SK-FP                                                      | cgggctgcaggaattcATGTCTACCACTGGCAATGGC                |
| UNE12-SK-RP                                                      | cgggccccctcgagCTATGAAGGGGTGCTCGATTCAGG               |
| MYC2-SK-FP                                                       | cgggctgcaggaattcATGACGGACTACCGGTTACCTTCA             |
| MYC2-SK-RP                                                       | cgggccccctcgagTTATTGGGTATCTCCAACCTTGGC               |
| ERF#74-SK-FP                                                     | cgggctgcaggaattcATGGAGGATTGCGAAGCT                   |
| ERF#74-SK-RP                                                     | cgggccccctcgagTTAATCTGCAGTGATGGATGAGGA               |
| bHLH162-SK-FP                                                    | tccccgggctgcaggaattcATGTTCAAGAAATTAAGCATAGCTTATCC    |
| bHLH162-SK-RP                                                    | ggtaccgggccccctcgagTTAGAACTCCCACAATTCTGGATTG         |
| WRKY70-SK-FP                                                     | cgggctgcaggaattcATGGGCACTCTTTGTTTCAGAGA              |
| WRKY70-SK-RP                                                     | cgggccccctcgagCTAAAAGATTCCGCTGTCATCA                 |
| WRKY46-SK-FP                                                     | cgggctgcaggaattcATGAAAAGGTTCGACGATGGATAGGG           |
| WRKY46-SK-RP                                                     | cgggccccctcgagCTAGAAGCAATCCAAGTCGTCAAAC              |
| SEPALLATA1-SK-FP                                                 | cgggctgcaggaattcATGGGAAGAGGGAGGGTTGAG                |
| SEPALLATA1-SK-RP                                                 | cgggccccctcgagTCACAGCATCCATCCTGGG                    |
| HSFA3-SK-FP                                                      | cgggctgcaggaattcATGGACAAAGAGGAACAAAACACTAC           |
| HSFA3-SK-RP                                                      | cgggccccctcgagTTACAGTAGGGGTGATTCAT                   |
| DOF1.2-SK-FP                                                     | cgggctgcaggaattcATGGAGAAAAAATGGAAACCAGACG            |
| DOF1.2-SK-RP                                                     | cgggccccctcgagTCAAGGTCTTGAATAGAGCTCAAA               |
| ERF#25-SK-FP                                                     | cgggctgcaggaattcATGTCTGTAACGACACAAACAC               |
| ERF#25-SK-RP                                                     | cgggccccctcgagTTACAATTCTAAACAAGACCCAG                |
| GTE12-SK-FP                                                      | cgggctgcaggaattcATGATTGCTACTGAAGCTGTAA               |
| GTE12-SK-RP                                                      | cgggccccctcgagTCATGAAAAAATTTCTCCCTCCTCG              |
| ERF#16-SK-FP                                                     | cgggctgcaggaattcATGGACATATTATTTCGGCCAAG              |
| ERF#16-SK-RP                                                     | cgggccccctcgagTCAAATTGAATGACTCCACAACGAC              |
| CitABF2-SK-FP                                                    | tccccgggctgcaggaattcATGGGAACACAGACAATGGGAT           |
| CitABF2-SK-RP                                                    | ggtaccgggccccctcgagTCAGAAGGGTGCTGAGCCTG              |

|                    |                                                      |
|--------------------|------------------------------------------------------|
| CitAGL6-SK-FP      | tccccgggctgcaggaattcATGGGGAGAGGAAGAGTGGAGC           |
| CitAGL6-SK-RP      | ggtaccgggccccctcgagTCAAAGGACCCATCCTTGGAT             |
| CitERF32-SK-FP     | tccccgggctgcaggaattcATGGAGAGTTACAAAAATCCCCA          |
| CitERF32-SK-RP     | ggtaccgggccccctcgagTCAGAAAGTTCCAAATGGAGGTAGG         |
| CitERF33-SK-FP     | tccccgggctgcaggaattcATGTCAAAGCACTTATGGGTGG           |
| CitERF33-SK-RP     | ggtaccgggccccctcgagTCAAACGCACCACGGAGTCG              |
| CitAP2-5-SK-FP     | tccccgggctgcaggaattcATGGAGGTTCTCAAGACCCTC            |
| CitAP2-5-SK-RP     | ggtaccgggccccctcgagCTAAGCATCAGTCCATGCAGCA            |
| CitRF2b-SK-FP      | tccccgggctgcaggaattcATGGAAAGCCAAGATCCCCC             |
| CitRF2b-SK-RP      | ggtaccgggccccctcgagTCAAATGTGCTGCTGCTTTCA             |
| CitMYB44-SK-FP     | tccccgggctgcaggaattcATGAAAATGGAACCACAAACGG           |
| CitMYB44-SK-RP     | ggtaccgggccccctcgagTTAGTTTTTAATCCTACCAGCCTCAT        |
| CitMADS1-SK-FP     | tccccgggctgcaggaattcATGGCGTTTCCAAATGAATTAGC          |
| CitMADS1-SK-RP     | ggtaccgggccccctcgagTTAAACTAACTGAAGGGCCATCTG          |
| CitMYB108-SK-FP    | tccccgggctgcaggaattcATGCACACAATGAGAGCAGCAA           |
| CitMYB108-SK-RP    | ggtaccgggccccctcgagTTACTCCCTAAGCTGCCATATGTC          |
| CitAZF2-SK-FP      | tccccgggctgcaggaattcATGGAGAAGCACAAGTGTAGGCT          |
| CitAZF2-SK-RP      | ggtaccgggccccctcgagTCACCGTTTGATGTGGTTTACAA           |
| CitRAV1-SK-FP      | tccccgggctgcaggaattcATGAAAAGAGAAAGAAATGGACGGA        |
| CitRAV1-SK-RP      | ggtaccgggccccctcgagTTACGAAGCTCCAATCATTCTTTG          |
| CitGT-2-SK-FP      | tccccgggctgcaggaattcATGGAAAACGAACTGGCGA              |
| CitGT-2-SK-RP      | ggtaccgggccccctcgagTTAATCCTCAATCTTGGCAGCA            |
| CitATHB-13-SK-FP   | tccccgggctgcaggaattcATGTCTTGCAATGGGATGGC             |
| CitATHB-13-SK-RP   | ggtaccgggccccctcgagTCAACTGAAATTGTGTTGCTCCA           |
| CitbHLH130-SK-FP   | tccccgggctgcaggaattcATGGATTCAAGTACTAATCATAATTATCATCA |
| CitbHLH130-SK-RP   | ggtaccgggccccctcgagTCAAACAATTTGATTCTCGACTGG          |
| CitREVEILLE6-SK-FP | tccccgggctgcaggaattcATGGTATCAAAAATCCCGAACCC          |
| CitREVEILLE6-SK-RP | ggtaccgggccccctcgagCTATTGGCCACCACCGAGG               |
| CitDof5.2-SK-FP    | tccccgggctgcaggaattcATGCGGCAAGAAAGTAAAGATCC          |
| CitDof5.2-SK-RP    | ggtaccgggccccctcgagTCAAGTGCTTTCATGGAAGTTGA           |
| CitbHLH74-SK-FP    | tccccgggctgcaggaattcATGGGTGCTGGTGACAATGATG           |
| CitbHLH74-SK-RP    | ggtaccgggccccctcgagTTAAAGCTCCGACTTCAAGCG             |
| CitSMH3-SK-FP      | tccccgggctgcaggaattcATGGGAAATCAGAAGCAAAAGTG          |
| CitSMH3-SK-RP      | ggtaccgggccccctcgagTCAAGCCAAAAGAACAATTCACC           |
| CitGATA16-SK-FP    | tccccgggctgcaggaattcATGATGGATCCGAGTGACAAAGG          |
| CitGATA16-SK-RP    | ggtaccgggccccctcgagCTAAGCATAAACGGAACCATAAGATAA       |
| CitERF48-SK-FP     | tccccgggctgcaggaattcATGGTTAATAGCAGACACAGTGTATCC      |
| CitERF48-SK-RP     | ggtaccgggccccctcgagTTAAATAGCAACAAGGTTATCCGACG        |

**For Y1H assays (into pAbAi vector or pGADT7 vector)**

|                    |                                               |
|--------------------|-----------------------------------------------|
| CHIL1proA-pAbAi-FP | AAAAGCTTGAATTCGAGCTCGATTTCAAGACCATGACCATTACC  |
| CHIL1proA-pAbAi-RP | ATGCCTCGAGGTCGACGTAGTCTATATTGAGGTTAATGTCC     |
| CHIL1proB-pAbAi-FP | AAAAGCTTGAATTCGAGCTCCAATGTAGCCTCATGAGTCAACAGC |
| CHIL1proB-pAbAi-RP | ATGCCTCGAGGTCGACCTAGAGTGCTACCATCCAAAGG        |
| CHIL1proC-pAbAi-FP | AAAAGCTTGAATTCGAGCTCAGGGACTTACTTTAATTTTAAACC  |
| CHIL1proC-pAbAi-RP | ATGCCTCGAGGTCGACGGTAATCTTTAGTGGGAAATTATTG     |
| AN20/AN1-AD-FP     | ggaggccagtgaattcATGGCGGAGGAGCACAGATTC         |
| AN20/AN1-AD-RP     | tcattctgcagctcgagTCAAATCTTCTCGAGCTTCTCCGC     |
| NAC47-AD-FP        | ggaggccagtgaattcATGGTTTGCATAAAGAACCCGG        |
| NAC47-AD-RP        | tcattctgcagctcgagTCATCCTTGAAACTGAAGATGTGGG    |
| UNE12-AD-FP        | ggaggccagtgaattcATGTCTACCACTGGCAATGGC         |
| UNE12-AD-RP        | tcattctgcagctcgagCTATGAAGGGGTGCTCGATTACAGG    |
| MYC2-AD-FP         | ggaggccagtgaattcATGACGGACTACCGGTTACCTTCA      |
| MYC2-AD-RP         | tcattctgcagctcgagTTATTGGGTATCTCCAACCTTTGGC    |
| ERF#74-AD-FP       | ggaggccagtgaattcATGGAGGATTGCGAAGCT            |
| ERF#74-AD-RP       | tcattctgcagctcgagTTAATCTGCAGTGATGGATGAGGA     |
| bHLH162-AD-FP      | ggaggccagtgaattcATGTTCAAGAAATTAAGCATAGCT      |
| bHLH162-AD-RP      | tcattctgcagctcgagTTAGAACTCCCAATTCTGGA         |

|                  |                                           |
|------------------|-------------------------------------------|
| WRKY70-AD-FP     | ggagggcagtgattcATGGGCACTCTTTGTTTCAGAGA    |
| WRKY70-AD-RP     | tcatctgcagctcgagCTAAAAGATTCCGCTGTCATCA    |
| WRKY46-AD-FP     | ggagggcagtgattcATGAAAAGGTTCGACGATGGATAGGG |
| WRKY46-AD-RP     | tcatctgcagctcgagCTAGAAGCAATCCAAGTCGTCAAAC |
| SEPALLATA1-AD-FP | ggagggcagtgattcATGGGAAGAGGGAGGGTTGAG      |
| SEPALLATA1-AD-RP | tcatctgcagctcgagTCACAGCATCCATCCTGGG       |
| HSFA3-AD-FP      | ggagggcagtgattcATGGACAAAGAGGAACAAAACACTAC |
| HSFA3-AD-RP      | tcatctgcagctcgagTTACAGTAGGGGTGATTCAT      |
| DOF1.2-AD-FP     | ggagggcagtgattcATGGAGAAAAAATGGAAACCAGACG  |
| DOF1.2-AD-RP     | tcatctgcagctcgagTCAAGGTCTTGAATAGAGCTCAA   |
| ERF#25-AD-FP     | ggagggcagtgattcATGTCTGTAACGACACAAACAC     |
| ERF#25-AD-RP     | tcatctgcagctcgagTTACAATTCTAAACAAGACCCAG   |
| GTE12-AD-FP      | ggagggcagtgattcATGATTGCTACTGAAGCTGTAA     |
| GTE12-AD-RP      | tcatctgcagctcgagTCATGAAAAAATTTCTCCCTCCTCG |
| ERF#16-AD-FP     | ggagggcagtgattcATGGACATATTATTTCGGCCAAG    |
| ERF#16-AD-RP     | tcatctgcagctcgagTCAAATTGAATGACTCCACAACGAC |
